# Supplementary material
Source: publisher site journal article supplement (https://www.dovepress.com/article/550753)
Supplement: Supplementary file 1 [file 550753_Supplementary%20Table%201.docx]

**Supplementary Table 1 Analysis of Potential Confounding Factors**

| **Item** | **Hypokalemia Group (n=56)** | **Normokalemia Group (n=153)** | ***P*-value** |
| --- | --- | --- | --- |
| **Admission Serum Magnesium (mmol/L, mean ± s)** | 0.78 ± 0.11 | 0.85 ± 0.13 | **0.002** |
| **Mannitol Use [No. (%)]** | 27 (48.2) | 68 (44.4) | 0.638 |

Note: Bold values indicate P<0.05.
